# Supplementary material
Source: publisher site journal article supplement (https://www.dovepress.com/get_supplementary_file.php?f=293290.xlsx)
Supplement: Supplementary file 1 [file get_supplementary_file.php]

## Sheet: Sheet1
Table S1: Full data set
					ANTIBIOGRAM											PHENOTYPIC SCREENING									GENOTYPIC SCREENING							OF ESBL, CARBAPENEMASES AND VIRULENCE FACTORS BY PCR																	MIC VALUES
					Pencillin	Cephalosporin	Monobactams	Aminogylcosides	Flouroquinolone		Fosfomycin	Polymixin		Carbapenems		mHodge Test	Biofilm	TCP	Biofilm	Virulence Factors (Phenotypic)					PCR ESBL Factors					PCR Carbapenmases			COL- determinants		PCR VIRULENCE FACTORS				Virulence Factors PCR detection
SR. #	SAMPLE .	Specimen	ESBLs	MDR/Not MDR	AMP	CRO	ATM	Genta	Cip	Levo	Fos	PB	PE	MEM	IPM		CRA	O.D	Biofilm	HMV	Capsule	Haemagglutination	Blood hemolysis	Gelatinase	TEM	SHV	CTXM-14	CTXM-15	OXA	blaNDM	blaKPC-2	OXA-48	mcr-1	mcr-2	iucA	kfu	rmp A	K-1	K-2	Bss	fim-H	mrk-D	yfcM	TraT	ompk35	ompk36	AcrAB	TolC	Levofloxacin
1	1	Blood	Positive	Not MDR	R	S	S	S	R	I	S	S	S	S	S		+ve	0.516	Strong	-ve	+ve	MSHA	-ve	-ve		+ve	+ve	+ve	-	-															+ve	+ve	+ve	+ve	0.25
2	2	Blood	Neg	Not MDR	R	S	S	S	S	S	S	S	S	S	S		+ve	0.466	Strong	-ve	+ve	MSHA	-ve	-ve																					+ve	+ve	+ve
3	3	Blood	Neg	Not MDR	R	S	R	S	S	I	S	S	S	S	S		+ve	0.56	Strong	-ve	+ve	MSHA	-ve	-ve																			+ve		-ve	-ve	+ve
4	4	Blood	Neg	Not MDR	R	S	S	S	R	R	S	S	S	S	S		+ve	0.323	Strong	-ve	+ve	MSHA	-ve	-ve																					-ve	+ve			8
5	5	Blood	Neg	MDR	R	R	S	R	R	S	S	S	R	S	S		+ve	0.563	Strong	+ve	+ve	MSHA	-ve	-ve		+ve		+ve		+ve		+ve	+ve	+ve	+ve	+ve	+ve			+ve	+ve		+ve		-ve	-ve	+ve	+ve	4
6	6	Blood	Positive	MDR	R	R	R	R	R	I	R	S	S	S	S		+ve	0.373	Strong	+ve	+ve	MSHA	-ve	-ve	+ve	+ve	-	+ve	-	+ve							+ve	+ve	+ve	+ve		+ve	+ve		+ve	-ve	+ve	+ve	0.5
7	7	Blood	Positive	MDR	R	R	R	R	R	R	S	S	S	S	S		+ve	0.52	Strong	-ve	+ve	MSHA	-ve	-ve	+ve	+ve	+ve	+ve	-	-													+ve		+ve	+ve	+ve	+ve	64
8	8	Blood	Positive	MDR	R	R	R	R	R	R	R	S	S	R	R	+ve	+ve	0.266	Strong	-ve	+ve	MSHA	-ve	-ve	+ve	+ve	-	+ve	-	-	+ve												+ve		+ve	+ve	+ve		128
9	9	Blood	Positive	MDR	R	R	S	R	R	R	S	S	S	S	S		+ve	0.673	Strong	-ve	+ve	MSHA	-ve	-ve	-	+ve	-		-	-													+ve		-ve	-ve			256
10	10	Blood	Positive	MDR	R	R	R	S	S	R	R	S	S	S	S		+ve	0.563	Strong	-ve	+ve	MSHA	-ve	-ve	-	+ve	-		-	-															-ve	-ve	+ve	+ve	64
11	11	Blood	Neg	Not MDR	R	S	R	S	S	S	R	S	S	S	S		+ve	0.556	Strong	+ve	+ve	MSHA	-ve	-ve		+ve	+ve	+ve		+ve	+ve	+ve				+ve	+ve			+ve	+ve				-ve	+ve	+ve
12	12	Blood	Neg	Not MDR	R	S	S	S	S	S	R	S	S	S	S		+ve	0.453	Strong	+ve	+ve	MSHA	α-hemolysis	-ve	+ve	+ve	+ve	+ve	+ve	+ve		+ve			+ve		+ve		+ve		+ve				-ve	+ve	+ve
13	13	Blood	Neg	Not MDR	R	S	S	S	S	R	R	S	S	S	S		+ve	0.21	Strong	-ve	+ve	MSHA	-ve	-ve																					-ve	+ve	+ve		128
14	14	Urine	Neg	Not MDR	R	S	S	S	S	I	S	S	S	S	S		+ve	0.503	Strong	-ve	+ve	MSHA	-ve	-ve																			+ve		-ve	+ve	+ve
15	15	Urine	Neg	MDR	R	R	R	S	S	S	R	S	S	S	S		+ve	0.646	Strong	+ve	+ve	MSHA	-ve	-ve		+ve	+ve	+ve		+ve		+ve					+ve								+ve	-ve	+ve
16	16	Urine	Positive	MDR	R	R	R	S	R	I	S	S	S	S	S		+ve	0.576	Strong	+ve	+ve	MSHA	-ve	-ve	-	+ve	+ve	+ve	-	+ve							+ve					+ve			+ve	+ve	+ve		4
17	17	Urine	Positive	MDR	R	R	R	I	R	S	S	S	S	S	S		+ve	0.836	Strong	-ve	+ve	MSHA	-ve	-ve	+ve	+ve	-	+ve	-	-															+ve	-ve	+ve		4
18	18	Urine	Neg	MDR	R	R	R	R	I	S	R	S	S	S	S		+ve	0.626	Strong	-ve	+ve	MSHA	β-hemolysis	-ve																			+ve		+ve	+ve	+ve		2
19	19	Urine	Neg	Not MDR	R	R	S	S	R	R	S	S	S	S	S		+ve	0.62	Strong	-ve	+ve	MSHA	-ve	-ve																					+ve	+ve	+ve		128
20	20	Urine	Neg	Not MDR	R	R	S	S	S	I	S	S	R	S	S		+ve	0.806	Strong	+ve	+ve	MRHA	β-hemolysis	+ve		+ve		+ve	+ve	+ve			+ve	+ve								+ve			-ve	-ve
21	21	Urine	Neg	MDR	R	R	R	S	R	R	S	S	S	S	S		+ve	0.706	Strong	+ve	+ve	MSHA	-ve	-ve	+ve	+ve		+ve	+ve	+ve							+ve			+ve		+ve			-ve	-ve	+ve		64
22	22	Pus	Neg	Not MDR	R	S	S	S	S	I	S	S	S	S	S		+ve	0.733	Strong	-ve	+ve	MSHA	-ve	-ve																					-ve	+ve	+ve
23	24	Nasal Swab	Positive	Not MDR	S	S	S	S	S	R	S	S	S	S	S		+ve	0.43	Strong	-ve	+ve	MSHA	-ve	-ve	+ve	+ve	-	+ve	-	-															+ve	+ve	+ve		>512
24	25	Urine	Neg	Not MDR	R	S	S	S	S	I	S	S	S	S	S		+ve	0.45	Strong	-ve	+ve	MSHA	-ve	-ve																					-ve	+ve	+ve
25	26	Urine	Neg	Not MDR	R	S	S	R	S	S	S	R	S	S	S		+ve	0.11	Weak	-ve	+ve	MSHA	-ve	-ve																					-ve	+ve	+ve
26	27	Urine	Neg	Not MDR	R	S	S	S	S	R	S	R	S	S	S		NBF	0.037	NBF	-ve	+ve	MSHA	-ve	-ve																					-ve	+ve	+ve		128
27	28	B.Fluid	Neg	Not MDR	R	S	S	S	S	R	S	R	S	S	S		NBF	0.036	NBF	-ve	+ve	MSHA	-ve	-ve																					+ve	-ve	+ve		256
28	30	Pus	Neg	MDR	R	R	R	S	R	I	S	R	S	S	S		NBF	0.036	NBF	-ve	+ve	MSHA	-ve	+ve																					-ve	+ve			128
29	32	Sputum	Neg	Not MDR	R	S	S	S	S	R	S	S	R	R	R	+ve	+ve	0.12	Weak	-ve	+ve	MSHA	β-hemolysis	+ve			+ve	+ve		+ve	+ve	+ve		+ve	+ve										+ve	-ve	+ve		256
30	35	Pus	Positive	MDR	R	R	R	R	R	I	S	R	S	S	S		+ve	0.27	Moderate	-ve	+ve	MSHA	-ve	-ve	+ve	+ve	-	+ve	+ve	-													+ve	+ve	+ve	-ve	+ve	+ve	64
31	36	Urine	Positive	MDR	R	R	R	S	R	I	R	S	R	R	R	+ve	+ve	0.311	Strong	+ve	+ve	MSHA	α-hemolysis	-ve	+ve	+ve	+ve	+ve	+ve	+ve								+ve		+ve					+ve	-ve	+ve	+ve	16
32	38	Urine	Neg	MDR	R	R	R	R	S	I	R	S	R	S	S		+ve	0.151	Moderate	-ve	+ve	MSHA	-ve	-ve				+ve	+ve	+ve			+ve							+ve			+ve		+ve	-ve	+ve
33	39	Urine	Neg	MDR	R	R	R	R	R	I	R	R	R	S	S		NBF	0.04	NBF	-ve	+ve	MSHA	-ve	-ve	+ve	+ve		+ve	+ve	+ve			+ve							+ve					+ve	+ve			64
34	43	Urine	Positive	MDR	R	R	S	R	R	I	R	S	S	S	S		+ve	0.211	Moderate	+ve	+ve	MSHA	-ve	-ve	+ve	+ve	+ve	+ve	+ve	+ve		+ve			+ve										+ve	+ve			>512
35	44	Pus	Neg	MDR	R	R	I	R	S	I	S	R	R	S	S		+ve	0.257	Strong	-ve	+ve	MSHA	β-hemolysis	+ve			+ve	+ve				+ve	+ve												-ve	+ve	+ve
36	46	Urine	Neg	MDR	R	R	R	R	S	R	S	S	S	S	S		+ve	0.155	Weak	-ve	+ve	MSHA	-ve	+ve																			+ve		-ve	+ve	+ve	+ve	128
37	49	Urine	Neg	MDR	R	R	R	R	R	I	R	R	S	S	S		+ve	0.32	Strong	-ve	+ve	MSHA	β-hemolysis	+ve																					+ve	+ve	+ve	+ve	2
38	50	Urine	Positive	MDR	R	R	S	R	R	I	R	S	R	S	S		+ve	0.385	Strong	+ve	+ve	MSHA	-ve	-ve	+ve	+ve	+ve	+ve	+ve	+ve					+ve					+ve					-ve	-ve	+ve		64
39	51	Urine	Neg	MDR	R	R	S	R	S	I	S	R	S	R	R	+ve	NBF	0.035	NBF	-ve	+ve	MSHA	-ve	-ve						+ve															+ve	+ve	+ve		16
40	52	Pus	Neg	MDR	R	I	R	I	R	R	S	I	S	S	S		+ve	0.11	Weak	-ve	+ve	MSHA	-ve	-ve																					-ve	-ve	+ve		64
41	53	Pus	Neg	Not MDR	R	R	S	S	S	R	I	R	S	S	S		+ve	0.11	Weak	-ve	+ve	MSHA	-ve	-ve																					+ve	+ve			128
42	54	Pus	Neg	MDR	R	R	R	R	S	R	R	S	S	R	R	+ve	+ve	0.46	Strong	+ve	+ve	MSHA	β-hemolysis	+ve				+ve		+ve		+ve					+ve			+ve	+ve			+ve	-ve	+ve	+ve	+ve	128
43	55	Urine	Neg	MDR	R	R	R	R	S	R	S	S	S	S	S		+ve	0.236	Moderate	-ve	+ve	MSHA	-ve	+ve																			+ve		+ve	+ve	+ve	+ve	64
44	56	Tracheal Swab	Neg	MDR	R	R	R	R	R	I	S	S	R	R	R	+ve	+ve	0.563	Strong	-ve	+ve	MSHA	-ve	-ve	+ve	+ve	+ve	+ve	+ve	+ve	+ve	+ve	+ve	+ve	+ve					+ve		+ve			+ve	-ve		+ve	>512
45	59	Tracheal Swab	Positive	MDR	R	R	S	R	R	R	S	I	R	R	R	+ve	+ve	0.253	Strong	-ve	+ve	MSHA	-ve	+ve	+ve	+ve	+ve	+ve	+ve	-	+ve	+ve	+ve	+ve	+ve					+ve	+ve	+ve	+ve		+ve	-ve	+ve	+ve	32
46	61	Pus	Neg	MDR	R	R	R	R	S	R	S	S	S	R	R	+ve	+ve	0.15	Moderate	-ve	+ve	MSHA	-ve	-ve						+ve															+ve	-ve		+ve	128
47	63	Tracheal Swab	Positive	MDR	R	R	R	R	R	R	S	R	S	R	R	+ve	+ve	0.22	Moderate	-ve	+ve	MSHA	-ve	-ve	+ve	+ve	-	+ve		+ve		+ve													+ve	+ve		+ve	>512
48	64	Blood	Positive	MDR	R	R	R	R	S	S	R	S	R	R	R	+ve	+ve	0.09	Weak	-ve	+ve	MSHA	-ve	-ve	+ve	+ve	+ve	+ve	+ve	+ve	+ve	+ve	+ve		+ve					+ve	+ve	+ve			-ve	-ve	+ve	+ve
49	65	Tissue	Positive	MDR	R	R	R	R	R	S	S	S	S	R	R	+ve	+ve	0.31	Moderate	-ve	+ve	MSHA	-ve	-ve	+ve	-	-	+ve	-	+ve															+ve	-ve	+ve		32
50	66	Catheter tip	Positive	MDR	R	R	R	R	S	R	S	S	S	R	R	+ve	+ve	0.161	Moderate	-ve	+ve	MSHA	-ve	+ve	-	-	+ve		+ve	+ve															+ve	-ve	+ve	+ve	256
51	67	Tracheal Swab	Neg	Not MDR	R	R	I	R	I	R	S	S	S	S	S		+ve	0.32	Moderate	-ve	+ve	MSHA	-ve	+ve																					-ve	-ve	+ve	+ve	64
52	70	Pus	Neg	MDR	R	R	R	I	S	I	S	R	S	R	R	+ve	+ve	0.137	Weak	-ve	+ve	MSHA	-ve	+ve																					+ve	-ve		+ve
53	71	Urine	Neg	MDR	R	R	R	R	S	I	S	R	S	S	S		+ve	0.446	Strong	-ve	+ve	MSHA	-ve	-ve																			+ve		+ve	+ve		+ve
54	73	Pus	Positive	MDR	R	R	R	R	R	R	R	S	R	R	R	+ve	+ve	0.1	Weak	-ve	+ve	MSHA	-ve	-ve	+ve	+ve	+ve	+ve	+ve	+ve	+ve	+ve	+ve		+ve			+ve		+ve					-ve	-ve		+ve	128
55	74	Tracheal Swab	Positive	MDR	R	R	R	S	S	R	R	R	S	R	R	+ve	+ve	0.353	Strong	-ve	+ve	MSHA	-ve	+ve	+ve	+ve	-	+ve	-	-															+ve	-ve		+ve	128
56	76	Urine	Positive	MDR	R	R	S	R	R	I	S	S	S	R	R	+ve	+ve	0.106	Weak	-ve	+ve	MSHA	-ve	-ve	+ve	+ve	-	+ve	-	+ve															+ve	-ve		+ve	256
57	81	Tracheal Swab	Neg	MDR	R	R	R	S	R	I	S	R	S	R	R	+ve	+ve	0.08	Weak	-ve	+ve	MSHA	α-hemolysis	-ve																					+ve	-ve
58	83	Pus	Neg	MDR	R	R	S	R	R	R	S	S	R	R	R	+ve	+ve	0.081	Weak	-ve	+ve	MSHA	-ve	-ve	+ve	+ve		+ve	+ve	+ve	+ve														+ve	+ve		+ve	>512
59	84	Tracheal Swab	Neg	MDR	R	R	S	R	R	R	S	R	S	R	R	+ve	+ve	0.144	Moderate	-ve	+ve	MSHA	-ve	-ve								+ve													-ve	-ve	+ve		>512
60	90	Urine	Neg	MDR	R	R	R	R	S	R	S	R	S	R	R	+ve	+ve	0.262	Strong	+ve	+ve	MSHA		+ve		+ve		+ve		+ve	+ve	+ve			+ve		+ve				+ve				+ve	-ve	+ve	+ve	256
61	93	Urine	Neg	MDR	R	R	S	R	S	R	R	S	S	S	S		+ve	0.731	Strong	-ve	+ve	MRHA	β-hemolysis	-ve																					-ve	+ve	+ve	+ve	>512
62	94	Urine	Neg	MDR	R	R	R	R	R	I	S	R	S	R	R	+ve	+ve	0.342	Strong	-ve	+ve	MSHA	-ve	-ve																					+ve	-ve		+ve	32
63	95	B.Fluid	Neg	MDR	R	R	R	R	R	R	S	R	S	R	R	+ve	+ve	0.08	Weak	-ve	+ve	MSHA	-ve	-ve																					+ve	-ve	+ve	+ve	8
64	96	Catheter tip	Positive	MDR	R	R	S	R	R	R	R	S	S	R	R	+ve	+ve	0.42	Strong	-ve	+ve	MSHA	-ve	-ve	+ve	+ve	-	+ve	+ve	+ve															-ve	-ve	+ve	+ve	16
65	97	B.Fluid	Neg	MDR	R	S	R	S	S	S	R	S	R	S	S		+ve	0.17	Weak	+ve	+ve	MSHA	β-hemolysis	+ve	+ve		+ve	+ve				+ve			+ve		+ve			+ve	+ve				+ve	+ve		+ve
66	98	Catheter tip	Positive	MDR	R	R	R	R	R	S	S	R	S	S	S		+ve	0.701	Strong	-ve	+ve	MSHA	α-hemolysis	+ve		+ve	+ve	+ve	+ve	-		+ve			+ve					+ve	+ve				+ve	+ve		+ve	32
67	100	Catheter tip	Neg	MDR	R	R	S	R	R	R	S	R	R	S	S		+ve	0.3	Strong	-ve	+ve	MSHA	-ve	+ve			+ve	+ve							+ve										+ve	+ve			256
68	102	Urine	Positive	MDR	R	R	R	R	R	R	S	R	S	S	S		+ve	0.438	Strong	+ve	+ve	MSHA	-ve	+ve	+ve	+ve	+ve	+ve	+ve	+ve					+ve					+ve	+ve				+ve	-ve	+ve		128
69	103	Catheter tip	Neg	MDR	R	S	R	I	R	I	R	R	S	S	S		+ve	0.075	Weak	-ve	+ve	MSHA	-ve	+ve																					+ve	+ve	+ve	+ve
70	104	Urine	Positive	MDR	R	R	S	R	R	S	R	R	R	R	R	+ve	+ve	0.09	Weak	-ve	+ve	MSHA	-ve	-ve	+ve	+ve	+ve	+ve	+ve	+ve		+ve	+ve	+ve						+ve	+ve				+ve	+ve	+ve		2
71	106	Urine	Neg	MDR	R	R	R	R	S	S	S	S	S	S	S		+ve	0.28	Strong	+ve	+ve	MSHA	-ve	-ve	+ve	+ve	+ve	+ve	+ve	+ve										+ve					-ve	-ve
72	109	Urine	Neg	MDR	R	S	R	R	R	S	S	R	R	S	S		+ve	0.236	Moderate	-ve	+ve	MSHA	-ve	-ve	+ve	+ve		+ve	+ve	+ve				+ve		+ve				+ve					+ve	-ve			16
73	110	Urine	Positive	MDR	R	R	R	R	R	R	R	S	S	R	R	+ve	+ve	0.385	Strong	+ve	+ve	MSHA	-ve	-ve	+ve	+ve	-	+ve	+ve	-		+ve					+ve			+ve					-ve	-ve	+ve	+ve	8
74	111	Urine	Neg	MDR	R	S	S	R	S	S	R	S	R	R	R	+ve	+ve	0.165	Moderate	+ve	+ve	MSHA	-ve	-ve	+ve	+ve	+ve	+ve	+ve	+ve			+ve	+ve						+ve					-ve	-ve
75	114	Urine	Neg	MDR	R	R	S	R	R	S	S	S	R	S	S		+ve	0.361	Strong	+ve	+ve	MSHA	-ve	-ve	+ve	+ve		+ve	+ve	+ve			+ve	+ve							+ve				+ve	-ve	+ve		32
76	119	Urine	Neg	MDR	R	R	R	S	R	S	S	R	S	S	S		+ve	0.07	Weak	-ve	+ve	MSHA	-ve	-ve																					+ve	-ve		+ve
77	121	Blood	Positive	MDR	R	R	R	R	R	R	S	R	S	S	S		+ve	0.621	Strong	-ve	+ve	MSHA	-ve	-ve	+ve	+ve	-	+ve	+ve	-															-ve	-ve	+ve	+ve	0.25
78	124	Blood	Neg	MDR	R	R	R	R	S	R	R	S	R	S	S		+ve	0.305	Strong	-ve	+ve	MSHA	-ve	-ve			+ve	+ve	+ve			+ve	+ve							+ve					-ve	-ve			>512
79	125	Urine	Neg	Not MDR	R	S	R	S	R	S	S	S	S	S	S		+ve	0.362	Strong	-ve	+ve	MRHA	-ve	-ve																					-ve	-ve	+ve		0.25
80	129	Blood	Neg	MDR	S	R	R	R	R	R	R	S	S	R	R	+ve	+ve	0.214	Moderate	-ve	+ve	MRHA	-ve	-ve						+ve															+ve	-ve	+ve	+ve	128
81	130	Blood	Neg	MDR	S	R	R	R	R	R	S	S	S	R	R	+ve	+ve	0.314	Strong	-ve	+ve	MSHA	-ve	-ve						+ve															+ve	+ve	+ve	+ve	256
82	133	Urine	Neg	Not MDR	R	R	S	S	S	R	S	S	S	S	S		+ve	0.153	Moderate	-ve	+ve	MSHA	-ve	-ve																					+ve	+ve	+ve		32
83	135	Urine	Neg	MDR	R	R	R	R	R	S	S	S	R	S	S		+ve	0.278	Strong	+ve	+ve	MSHA	-ve	-ve				+ve		+ve				+ve		+ve	+ve								+ve	-ve	+ve	+ve	2
84	137	Urine	Neg	Not MDR	R	S	S	R	S	I	S	S	S	S	S		+ve	0.189	Moderate	+ve	+ve	MSHA	-ve	-ve	+ve			+ve		+ve					+ve		+ve					+ve			-ve	-ve
85	140	Urine	Neg	MDR	R	R	R	R	S	R	S	S	S	S	S		+ve	0.156	Moderate	+ve	+ve	MSHA	-ve	-ve	+ve			+ve		+ve		+ve					+ve								-ve	+ve	+ve	+ve	256
86	141	Blood	Positive	MDR	R	R	R	R	R	I	S	S	S	S	S		+ve	0.184	Moderate	-ve	+ve	MSHA	-ve	-ve	-		-	+ve	+ve	-															-ve	+ve	+ve	+ve	32
87	149	Pus	Neg	Not MDR	R	S	S	R	S	I	S	S	S	S	S		+ve	0.241	Moderate	-ve	+ve	MSHA	-ve	-ve																					-ve	+ve	+ve	+ve
88	153	Pus	Positive	MDR	S	R	R	R	R	I	R	S	S	R	R	+ve	+ve	0.38	Strong	+ve	+ve	MSHA	-ve	-ve	+ve	+ve	-	+ve	+ve	-							+ve					+ve			+ve	-ve	+ve	+ve	16
89	156	Catheter tip	Positive	MDR	S	R	R	R	R	I	S	S	S	R	R	+ve	+ve	0.25	Strong	-ve	+ve	MSHA			-		-		-	+ve															-ve	+ve
90	158	Urine	Positive	MDR	S	R	R	R	R	I	S	S	S	S	S		+ve	0.2	Moderate	-ve	+ve	MSHA	-ve	-ve	+ve	+ve	-	+ve	+ve	-															+ve	+ve	+ve	+ve	8
91	161	Urine	Neg	Not MDR	S	S	R	S	S	R	R	S	S	S	S		+ve	0.175	Moderate	-ve	+ve	MSHA	-ve	-ve																					-ve	-ve			>512
92	166	Blood	Positive	MDR	R	R	R	R	R	R	S	S	R	R	R	+ve	+ve	0.2	Moderate	+ve	+ve	MSHA	-ve	-ve	+ve	+ve	+ve	+ve	-	+ve		+ve	+ve	+ve			+ve								-ve	-ve	+ve		8
93	170	Pus	Neg	MDR	R	R	R	R	S	R	S	S	S	S	S		+ve	0.25	Strong	-ve	+ve	MRHA	β-hemolysis	+ve																					-ve	-ve	+ve	+ve	>512
94	178	Urine	Positive	MDR	R	R	S	R	R	R	S	S	S	S	S		+ve	0.11	Weak	-ve	+ve	MSHA	-ve	-ve	+ve	+ve	-	+ve	+ve	-															+ve	+ve	+ve		>512
95	179	Pus	Positive	Not MDR	S	S	S	S	S	S	S	S	S	S	S		+ve	0.2	Moderate	-ve	+ve	MSHA	-ve	-ve	+ve		-	+ve	-	-															-ve	-ve	+ve	+ve	256
96	189	Urine	Positive	MDR	R	R	R	R	R	R	S	S	S	S	S		+ve	0.267	Strong	+ve	+ve	MSHA	-ve	-ve	+ve	+ve	+ve	+ve	-	+ve		+ve					+ve								-ve	-ve	+ve	+ve	64
97	190	Urine	Neg	MDR	R	R	R	S	R	R	R	S	S	S	S		+ve	0.1	Weak	-ve	+ve	MSHA	-ve	-ve																					-ve	-ve	+ve	+ve	32
98	191	Urine	Neg	Not MDR	S	R	S	R	S	S	S	S	S	S	S		+ve	0.14	Moderate	-ve	+ve	MSHA	β-hemolysis	-ve																					+ve	-ve	+ve	+ve
99	193	Urine	Neg	MDR	R	R	R	R	R	R	R	S	S	S	S		+ve	0.204	Moderate	-ve	+ve	MSHA	-ve	-ve																					-ve	-ve	+ve	+ve	64
100	194	Urine	Neg	MDR	R	R	R	R	R	R	R	R	R	R	R	+ve	+ve	0.276	Strong	+ve	+ve	MSHA	-ve	+ve		+ve	+ve	+ve		+ve		+ve	+ve				+ve								+ve	+ve			>512
SR. #	SAMPLE .	Specimen	ESBLs	MDR/Not MDR	AMP	CRO	ATM	Genta	Cip	Levo	Fos	PB	PE	MEM	IPM		CRA	O.D	Biofilm	HMV	Capsule	Haemagglutination	Blood hemolysis	Gelatinase	TEM	SHV	CTXM-14	CTXM-15	OXA	blaNDM	blaKPC-2	OXA-48	mcr-1	mcr-2	iucA	kfu	rmp A	K-1	K-2	Bss	fim-H	mrk-D	yfcM	TraT	ompk35	ompk36	AcrAB	TolC	new levo
101	1	B.Fluid	Neg	MDR	R	R	S	R	S	I	R	S	S	R	R	+ve	+ve	0.063	Weak	+ve	+ve	MSHA	-ve					+ve		+ve											+ve	+ve			-ve	-ve	+ve
102	2	Urine	Neg	Not MDR	R	R	S	S	R	S	S	R	S	S	S		+ve	0.1026	Moderate	+ve	+ve	MSHA	-ve			+ve		+ve				+ve								+ve	+ve	+ve	+ve	+ve	+ve	+ve		+ve	4
103	3	Urine	Neg	Not MDR	R	R	S	S	S	S	S	R	S	S	S		+ve	0.155	Moderate	-ve	+ve	MSHA	-ve																				+ve		-ve	+ve	+ve
104	4	Urine	Positive	Not MDR	R	R	S	S	R	I	S	S	S	S	S		+ve	0.191	Moderate	+ve	+ve	MSHA	-ve		+ve	+ve	-	+ve	-	-									+ve	+ve	+ve	+ve			+ve	-ve	+ve	+ve	4
105	5	Urine	Neg	Not MDR	R	R	S	S	S	S	S	S	S	S	S		+ve	0.117	Moderate	+ve	+ve	MSHA	-ve			+ve		+ve				+ve					+ve				+ve	+ve			+ve	-ve		+ve
106	6	Urine	Neg	MDR	R	R	R	R	R	R	S	S	S	R	R	+ve	+ve	0.245	Strong	-ve	+ve	MSHA	-ve							+ve		+ve									+ve	+ve			+ve	+ve			64
107	7	Urine	Neg	MDR	R	R	R	S	R	R	S	S	S	S	S		+ve	0.156	Moderate	-ve	+ve	MSHA	-ve																				+ve	+ve	-ve	+ve			16
108	8	Urine	Neg	Not MDR	R	R	S	S	R	S	S	S	S	S	S		+ve	0.214	Strong	-ve	+ve	MSHA	-ve																				+ve		+ve	-ve			4
109	9	Urine	Neg	Not MDR	R	I	S	S	S	S	S	S	S	S	S		+ve	0.113	Moderate	-ve	+ve	MSHA	-ve																						-ve	-ve
110	10	B.Fluid	Neg	MDR	R	R	R	R	R	I	S	S	S	R	R	+ve	+ve	0.218	Strong	-ve		MSHA	-ve							+ve		+ve									+ve	+ve	+ve		+ve	+ve			16
111	11	B.Fluid	Neg	MDR	R	R	R	R	R	R	S	S	S	R	R	+ve	+ve	0.23	Strong	-ve	+ve	MSHA	-ve							+ve											+ve	+ve			-ve	+ve	+ve		16
112	12	Sputum	Neg	Not MDR	R	S	S	S	S	I	S	S	S	S	S		+ve	0.099	Weak	+ve	+ve	MSHA	-ve			+ve				+ve										+ve	+ve	+ve	+ve		-ve	+ve		+ve
113	13	Blood	Neg	MDR	R	R	R	R	S	S	S	S	S	R	R	+ve	+ve	0.116	Moderate	-ve	+ve	MSHA	-ve							+ve		+ve									+ve	+ve			+ve	+ve
114	14	Pus	Positive	MDR	R	R	R	S	S	S	S	S	S	S	R	+ve	+ve	0.106	Moderate	-ve	+ve	MSHA	-ve		+ve	-	-		-	+ve											+ve	+ve			+ve	+ve	+ve
115	15	Urine	Neg	Not MDR	R	I	S	S	S	S	S	S	S	S	S		+ve	0.244	Strong	+ve	+ve	MSHA	-ve			+ve		+ve									+ve					+ve			+ve	+ve
116	16	Pus	Neg	Not MDR	R	S	S	R	R	S	S	S	S	S	S		+ve	0.13	Moderate	-ve	+ve	MSHA	-ve																				+ve		-ve	+ve	+ve		64
117	17	B.Fluid	Positive	Not MDR	R	R	R	S	S	S	S	S	S	S	S		+ve	0.154	Moderate	-ve	+ve	MSHA	-ve		+ve	+ve	-	+ve	+ve	+ve			+ve												+ve	+ve
118	18	B.Fluid	Positive	MDR	R	R	S	R	R	S	S	S	S	S	R	+ve	+ve	0.083	Weak	-ve	+ve	MSHA	-ve			-	-		-	+ve											+ve	+ve			+ve	-ve			2
119	19	Urine	Positive	Not MDR	R	R	R	S	S	S	S	S	S	S	S		+ve	0.147	Moderate	-ve	+ve	MSHA	-ve		+ve	-	-	+ve	-	-															+ve	+ve
120	20	Urine	Neg	Not MDR	R	S	S	S	S	S	S	S	S	S	S		+ve	0.146	Moderate	-ve	+ve	MSHA	-ve																					+ve	-ve	-ve
121	21	Pus	Neg	MDR	R	R	R	R	R	R	S	S	S	R	R	+ve	+ve	0.16	Moderate	+ve	+ve	MSHA	-ve				+ve	+ve		+ve		+ve					+ve				+ve	+ve			-ve	+ve			16
122	22	Pus	Neg	Not MDR	R	I	S	S	S	S	R	S	S	S	S		+ve	0.43	Strongst	-ve	+ve	MSHA	-ve																				+ve		+ve	+ve
123	23	Blood	Neg	MDR	R	S	S	R	R	S	S	S	S	S	R	+ve	+ve	0.297	Strong	-ve	+ve	MSHA	-ve							+ve		+ve									+ve				+ve	+ve			1
124	24	Urine	Positive	MDR	R	R	R	R	R	R	S	S	S	S	S		+ve	0.1256	Moderate	-ve	+ve	MSHA	-ve		+ve	-	-	+ve	-	-															+ve	+ve			32
125	25	B.Fluid	Positive	MDR	R	R	R	R	R	R	S	S	S	S	S		+ve	0.068	Weak	-ve	+ve	MSHA	-ve		+ve	-	-	+ve	-	-															+ve	+ve			64
126	26	Sputum	Neg	Not MDR	R	R	R	S	S	R	I	S	S	S	S		+ve	0.273	Strong	-ve	+ve	MSHA	-ve																						-ve	+ve			>512
127	27	B.Fluid	Neg	MDR	R	R	R	R	R	I	S	S	S	R	R	+ve	+ve	0.297	Strong	-ve	+ve	MSHA	-ve							+ve											+ve	+ve			-ve	-ve			32
128	28	Pus	Neg	Not MDR	R	R	R	S	S	S	S	S	S	S	S		+ve	0.178	Strong	-ve	+ve	MSHA	-ve																						-ve	+ve
129	29	Urine	Neg	Not MDR	R	R	S	S	S	S	S	S	S	S	I		+ve	0.67	Strongst	-ve	+ve	MSHA	-ve																						+ve	-ve
130	30	Urine	Neg	Not MDR	R	S	S	R	R	I	S	S	S	S	S		+ve	0.44	Strong	-ve	+ve	MSHA	-ve																						-ve	+ve			16
131	31	B.Fluid	Neg	Not MDR	R	S	S	S	I	S	R	S	S	S	S		+ve	0.168	Moderate	-ve	+ve	MSHA	-ve																						+ve	-ve
132	32	Pus	Positive	MDR	R	R	R	R	R	S	S	S	S	S	S		+ve	0.061	Weak	-ve	+ve	MSHA	-ve		+ve	-	-	+ve	+ve	-															+ve	+ve			64
133	33	Tissue	Neg	Not MDR	R	S	S	S	S	S	S	S	S	S	S		+ve	0.118	Moderate	-ve	+ve	MSHA	-ve																						-ve	+ve
134	34	Blood	Neg	Not MDR	R	S	R	S	I	S	S	S	S	R	R	+ve	+ve	0.64	Moderate	-ve	+ve	MSHA	-ve							+ve											+ve	+ve	+ve		+ve	-ve
135	35	Pus	Neg	MDR	R	R	R	R	R	I	R	S	S	S	R	+ve	+ve	0.114	Moderate	+ve	+ve	MSHA	-ve		+ve	+ve		+ve	+ve	+ve		+ve				+ve							+ve		+ve	-ve			2
136	36	Urine	Neg	Not MDR	R	S	S	S	S	S	S	S	S	S	S		+ve	0.09	Weak	-ve	+ve	MSHA	-ve																				+ve		-ve	-ve
137	37	Pus	Positive	MDR	R	R	R	S	S	I	S	S	S	S	R	+ve	+ve	0.119	Moderate	-ve	+ve	MSHA	-ve		+ve		-	+ve	-	+ve													+ve		+ve	+ve
138	38	Pus	Neg	MDR	R	R	R	S	S	R	S	S	S	S	R	+ve	+ve	0.13	Moderate	-ve	+ve	MSHA	-ve							+ve												+ve	+ve		-ve	+ve			128
139	39	Pus	Positive	MDR	R	R	R	S	S	S	S	S	R	S	R	+ve	+ve	0.162	Moderate	+ve	+ve	MSHA	-ve		+ve	+ve	-	+ve	-	+ve			+ve								+ve	+ve			+ve	+ve
140	40	Pus	Neg	MDR	R	R	R	R	R	R	S	S	S	R	R	+ve	+ve	0.084	Weak	-ve	+ve	MSHA	-ve							+ve											+ve		+ve		+ve	+ve			32
141	41	Urine	Neg	Not MDR	I	S	S	S	S	S	R	R	S	S	S		+ve	0.104	Weak	-ve	+ve	MSHA	-ve																				+ve		-ve	+ve
142	42	Urine	Neg	MDR	R	R	R	S	I	R	S	S	R	S	S		+ve	0.104	Weak	-ve	+ve	MSHA	-ve				+ve	+ve					+ve	+ve						+ve	+ve				+ve	+ve		+ve
143	43	Blood	Neg	MDR	R	R	R	R	S	R	S	S	S	R	R	+ve	NBF	0.087	non	-ve	+ve	MSHA	-ve							+ve															+ve	+ve
144	44	Pus	Neg	MDR	R	R	R	R	R	R	S	S	S	R	R	+ve	+ve	0.208	Moderate	-ve	+ve	MSHA	-ve							+ve															-ve	+ve			64
145	45	Urine	Neg	Not MDR	R	S	S	S	R	R	R	S	S	S	S		NBF	0.088	non	-ve	+ve	MSHA	-ve																						-ve	-ve			64
146	46	Urine	Neg	Not MDR	R	S	R	S	S	I	S	S	S	S	S		NBF	0.082	non	-ve	+ve	MSHA	-ve																						-ve	+ve
147	47	Urine	Neg	Not MDR	R	S	S	S	S	S	S	S	S	S	S		+ve	0.128	Weak	-ve	+ve	MSHA	-ve																				+ve		-ve	+ve
148	48	Pus	Neg	MDR	R	R	R	R	R	I	S	S	S	R	R	+ve	+ve	0.361	Strong	-ve	+ve	MSHA	-ve							+ve													+ve		+ve	+ve			8
149	49	Urine	Neg	MDR	R	R	R	R	R	R	S	S	S	R	R	+ve	+ve	0.08	Weak	+ve	+ve	MSHA	-ve		+ve	+ve		+ve	+ve	+ve		+ve			+ve						+ve		+ve		+ve	-ve			64
150	50	Blood	Neg	MDR	R	R	R	R	R	R	S	S	S	R	R	+ve	NBF	0.077	non	-ve	+ve	MSHA	-ve							+ve		+ve											+ve	+ve	+ve	+ve			16
151	51	Blood	Neg	MDR	R	R	R	S	R	S	S	S	S	S	R	+ve	+ve	0.098	Weak	-ve	+ve	MSHA	-ve									+ve											+ve		+ve	+ve	+ve		1
152	52	Pus	Neg	Not MDR	R	S	S	S	S	S	S	S	R	S	S		+ve	0.111	Weak	-ve	+ve	MSHA	-ve			+ve		+ve					+ve	+ve							+ve	+ve	+ve		-ve	+ve		+ve
153	53	B.Fluid	Neg	MDR	R	R	R	R	R	I	I	S	R	R	R	+ve	+ve	0.126	Weak	-ve	+ve	MSHA	-ve					+ve		+ve		+ve	+ve	+ve									+ve		-ve	+ve			16
154	54	Urine	Neg	MDR	R	R	I	R	R	R	S	S	S	S	S		+ve	0.21	Moderate	-ve	+ve	MSHA	-ve																				+ve		-ve	+ve			32
155	55	Pus	Neg	MDR	R	R	R	S	S	S	R	S	S	S	S		NBF	0.088	non	-ve	+ve	MSHA	-ve																						+ve	+ve
156	56	Pus	Neg	Not MDR	R	S	S	S	S	S	S	S	S	S	S		+ve	0.132	Weak	-ve	+ve	MSHA	-ve																						+ve	-ve
157	57	Urine	Neg	Not MDR	R	S	S	S	S	S	S	S	S	S	S		NBF	0.079	non	-ve	+ve	MSHA	-ve																				+ve		+ve	+ve
158	58	Sputum	Neg	Not MDR	I	R	R	S	S	S	S	S	S	S	S		+ve	0.229	Moderate	-ve	+ve	MSHA	-ve																				+ve		-ve	+ve
159	59	B.Fluid	Neg	MDR	R	R	R	R	R	I	R	S	S	R	R	+ve	+ve	0.112	Weak	-ve	+ve	MSHA	-ve					+ve		+ve		+ve													-ve	-ve			16
160	60	Sputum	Positive	Not MDR	R	R	R	S	S	S	S	S	S	S	S		+ve	0.22	Strong	-ve	+ve	MSHA	-ve		-	-	-	+ve	-	-															+ve	+ve
161	61	Pus	Positive	Not MDR	R	S	I	S	S	S	S	S	S	S	S		+ve	0.144	Moderate	-ve	+ve	MSHA	-ve		+ve	+ve	-	+ve	+ve	-															+ve	+ve
162	62	Urine	Neg	Not MDR	R	S	S	R	R	R	S	S	S	S	S		+ve	0.098	Weak	-ve	+ve	MSHA	-ve																						-ve	-ve			32
163	63	Urine	Neg	Not MDR	R	S	S	S	S	R	S	S	S	S	S		NBF	0.087	non	-ve	+ve	MSHA	-ve																						+ve	+ve			64
164	64	Blood	Neg	MDR	R	R	R	R	R	I	S	S	S	R	R	+ve	NBF	0.078	non	-ve		MSHA	-ve							+ve															-ve	+ve			>512
165	65	B.Fluid	Neg	MDR	R	R	S	R	R	I	S	S	S	S	R	+ve	+ve	0.111	Weak	-ve	+ve	MSHA	-ve		+ve	+ve		+ve	+ve			+ve											+ve		+ve	-ve	+ve		>512
166	66	Urine	Positive	Not MDR	R	R	R	S	S	S	S	S	S	S	S		+ve	0.073	Weak	+ve	+ve	MSHA	-ve		+ve	+ve	-	+ve	-	-										+ve		+ve			-ve	-ve		+ve
167	67	Pus	Positive	MDR	R	R	R	S	R	R	S	S	S	S	S		+ve	0.074	Weak	-ve	+ve	MSHA	-ve		+ve	+ve	-	+ve	+ve	-															-ve	+ve			16
168	68	Urine	Neg	MDR	R	R	R	R	R	R	S	S	S	R	R	+ve	+ve	0.103	Weak	-ve	+ve	MSHA	-ve							+ve		+ve													-ve	-ve			16
169	69	Urine	Neg	MDR	R	R	R	R	R	S	R	S	S	R	R	+ve	+ve	0.432	Strong	-ve	+ve	MSHA	-ve																						-ve	+ve			256
170	70	Urine	Neg	MDR	R	R	R	R	R	S	S	S	S	O	R	+ve	+ve	0.186	Moderate	-ve	+ve	MSHA	-ve																						-ve	-ve	+ve		>512
171	71	Urine	Neg	Not MDR	I	I	S	S	R	R	S	S	S	S	S		+ve	0.108	Weak	-ve	+ve	MSHA	-ve																						+ve	+ve	+ve		1
172	72	Pus	Neg	Not MDR	R	S	S	S	R	R	S	S	S	S	S		+ve	0.076	Weak	-ve	+ve	MSHA	-ve									+ve													+ve	-ve	+ve		32
173	73	Catheter tip	Neg	MDR	R	S	R	R	R	R	S	S	S	R	R	+ve	+ve	0.0716	Weak	+ve	+ve	MRHA	-ve			+ve	+ve	+ve				+ve								+ve	+ve	+ve			-ve	+ve	+ve	+ve	>512
174	74	Blood	Neg	MDR	R	R	R	R	R	R	S	S	S	R	R	+ve	+ve	0.075	Weak	-ve	+ve	MSHA	-ve																						+ve	+ve	+ve		>512
175	75	Urine	Neg	Not MDR	R	S	R	S	S	R	S	S	S	S	S		+ve	0.224	Strong	-ve	+ve	MSHA	-ve	+ve																			+ve		+ve	+ve	+ve		>512
176	76	Urine	Neg	Not MDR	R	R	I	R	S	R	S	S	S	S	S		+ve	0.124	Moderate	+ve	+ve	MSHA	ß hemolysis	+ve	+ve	+ve		+ve	+ve	+ve		+ve				+ve				+ve	+ve	+ve	+ve		-ve	+ve	+ve	+ve	>512
177	77	Blood	Neg	MDR	R	R	R	S	R	R	S	R	R	R	R	+ve	+ve	0.152	Moderate	-ve	+ve	MSHA	-ve					+ve				+ve	+ve	+ve							+ve	+ve			-ve	+ve	+ve	+ve	64
178	78	Urine	Neg	Not MDR	R	S	R	S	S	S	S	S	S	S	S		+ve	0.086	Weak	+ve	+ve	MSHA	-ve			+ve							+ve								+ve	+ve			+ve	-ve	+ve
179	79	Urine	Neg	Not MDR	R	S	S	S	S	S	S	S	S	S	S		+ve	0.089	Weak	-ve	+ve	MSHA	-ve																						-ve	-ve	+ve
180	80	Pus	Neg	MDR	R	R	R	R	R	S	S	S	S	R	R	+ve	+ve	0.083	Weak	-ve	+ve	MSHA	-ve							+ve		+ve													+ve	-ve	+ve		32
181	81	Urine	Neg	Not MDR	R	S	S	S	S	R	S	S	S	S	I		+ve	0.073	Weak	-ve	+ve	MSHA	-ve																						-ve	-ve	+ve		>512
182	82	B.Fluid	Neg	Not MDR	R	S	S	S	S	S	S	S	R	S	I		+ve	0.066	Weak	-ve	+ve	MSHA	-ve					+ve				+ve	+ve	+ve						+ve		+ve			+ve	+ve	+ve	+ve
183	83	Catheter tip	Neg	Not MDR	R	I	S	S	R	R	S	S	S	S	S		+ve	0.074	Weak	-ve	+ve	MSHA	-ve																						+ve	-ve	-ve		64
184	84	Pus	Neg	MDR	R	R	R	R	R	I	S	S	S	R	R	+ve	+ve	0.072	Weak	-ve	+ve	MSHA	-ve							+ve		+ve													-ve	+ve	+ve		32
185	85	Pus	Neg	MDR	R	R	R	R	R	I	S	S	S	R	R	+ve	+ve	0.162	Moderate	-ve	+ve	MSHA	-ve							+ve															+ve	-ve	+ve		16
186	86	Pus	Neg	Not MDR	R	R	S	R	S	R	S	S	S	S	S		+ve	0.092	Weak	+ve	+ve	MSHA	-ve			+ve		+ve												+ve		+ve			-ve	+ve	+ve	+ve	>512
187	87	Urine	Positive	Not MDR	R	R	R	S	S	S	S	S	S	S	S		+ve	0.112	Moderate	-ve	+ve	MSHA	-ve		+ve	+ve	-	+ve	-	-															+ve	+ve	+ve
188	88	Blood	Neg	Not MDR	R	I	S	I	S	S	S	S	S	S	S		+ve	0.066	Weak	-ve	+ve	MSHA	-ve																						+ve	-ve	+ve
189	89	BILE	Neg	MDR	R	R	S	R	R	R	S	S	S	R	R	+ve	+ve	0.071	Weak	+ve	+ve	MSHA	-ve			+ve				+ve		+ve										+ve			+ve	+ve	+ve	+ve	128
190	90	Pus	Neg	MDR	R	R	R	R	R	S	R	S	S	R	R	+ve	+ve	0.068	Weak	-ve	+ve	MSHA	-ve																						+ve	+ve			64
191	91	Pus	Positive	Not MDR	R	R	R	S	I	S	S	S	S	S	S		+ve	0.136	Moderate	-ve	+ve	MSHA	-ve		+ve	+ve	-	+ve	-	-															+ve	+ve
192	92	Pus	Neg	MDR	R	R	R	R	R	I	S	S	S	S	R	+ve	+ve	0.07	Weak	-ve	+ve	MSHA	-ve					+ve																	-ve	-ve			32
193	93	Urine	Positive	MDR	R	R	S	R	R	R	R	S	S	S	S		+ve	0.074	Weak	+ve	+ve	MSHA	-ve	+ve	+ve	+ve		+ve	+ve	+ve											+ve				+ve	+ve			128
194	94	Urine	Positive	MDR	R	R	R	R	R	R	S	S	R	S	S		+ve	0.068	Weak	-ve	+ve	MSHA	-ve		+ve	+ve		+ve	-	-		+ve	+ve	+ve							+ve				+ve	+ve			16
195	95	Urine	Neg	MDR	R	R	R	R	R	R	S	S	S	R	R	+ve	+ve	0.13	Moderate	-ve	+ve	MSHA	-ve																						-ve	-ve			32
196	96	B.Fluid	Neg	MDR	R	R	S	S	R	S	S	S	S	R	R	+ve	+ve	0.077	Weak	-ve	+ve	MSHA	-ve							+ve															-ve	-ve			1
197	97	BILE	Neg	MDR	R	R	R	R	R	R	S	S	S	R	R	+ve	+ve	0.117	Moderate	-ve	+ve	MSHA	-ve							+ve													+ve	+ve	-ve	-ve			1
198	98	Blood	Positive	Not MDR	R	R	R	S	S	S	S	S	S	S	S		+ve	0.42	Strong	-ve	+ve	MSHA	-ve		+ve	+ve	-	+ve	-	-															+ve	-ve
199	99	Urine	Neg	Not MDR	R	S	S	S	S	S	S	S	S	S	R	+ve	+ve	0.187	Moderate	-ve	+ve	MSHA	-ve																						+ve	+ve
200	100	Catheter tip	Neg	MDR	R	R	R	R	R	S	S	S	S	R	R	+ve	+ve	0.278	Strong	-ve	+ve	MSHA	-ve							+ve															+ve	+ve			64
TOTAL				MDRs 125	R=188	R=142	R=118	R=109	R= 107	R= 82	R= 43	R= 32	R= 30	R= 63	R= 75		B.F=187			HMV=43	Capsule=198	Haemagglutination=200	hemolysis= 15	gelatinase= 24	TEM=60	SHV=69	CTX14=30	CTX15=91	OXA=39	NDM=78	KPC2=9	OXA48= 48	mcr-1= 24	mcr2= 17	iucA=16	kfu=6	rmp A=21	K1=3	K2=3	bss= 31	FimH=38	mrk-D=35	ycfm=43	TraT=7	ompk35=111	ompk36=110	AcrAB=97	TolC=62
[truncated: 2 more columns]
